# Supplementary material for: Effect of Esomeprazole Treatment on Extracellular Tumor pH in a Preclinical Model of Prostate Cancer by MRI-CEST Tumor pH Imaging
Source: MDPI journal article supplement (doi:10.3390/metabo13010048), 2022-12-28
Supplement: s1 [file s1]

## SUPPLEMENTARY MATERIAL

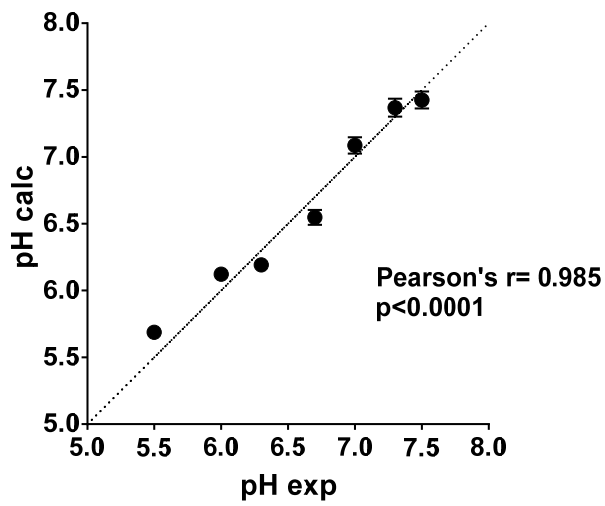

**Figure S1.** Calculated pH values vs experimental measured ones obtained with the pH-Xtra Glycolysis Assay.

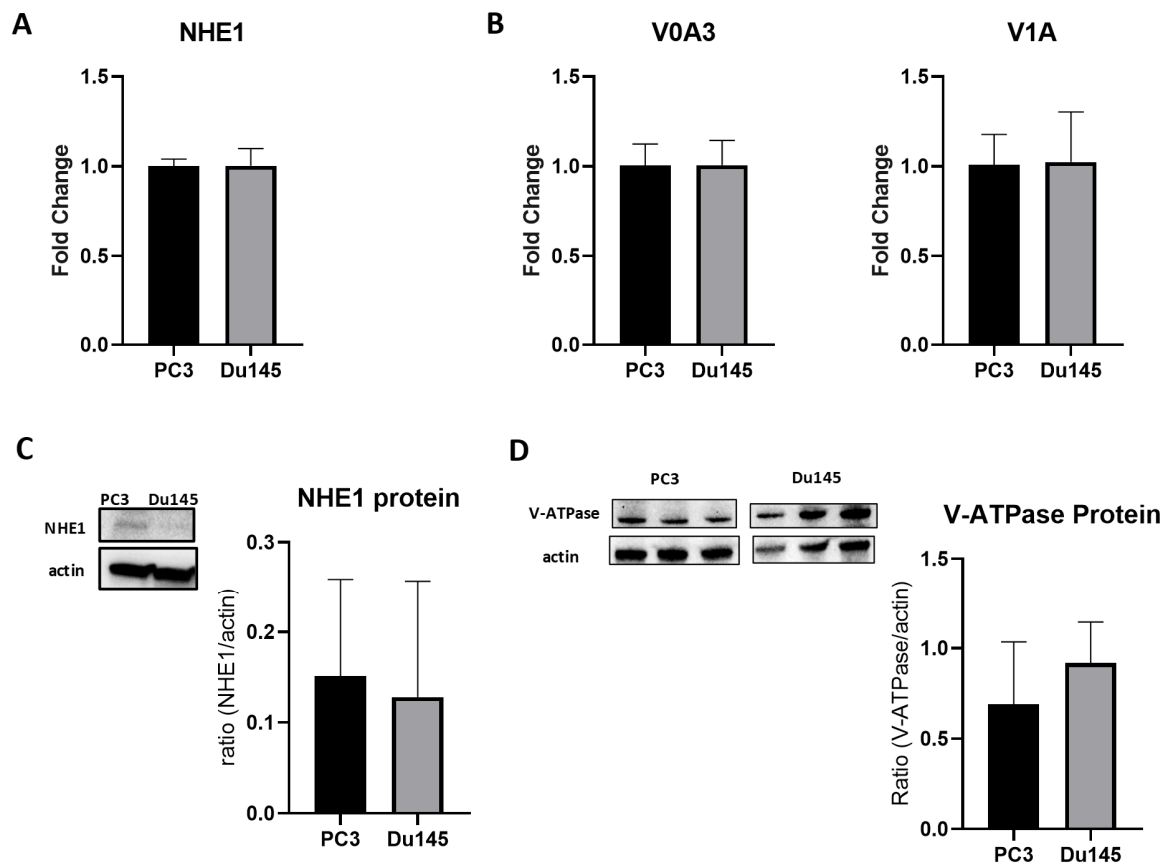

**Figure S2.** mRNA expression for the proton transporters NHE1 (A) and for the two subunits V0A3 and V1A for the V-ATPase (B); WB and corresponding quantification of protein levels for the NHE1 (C) and V-ATPase (D) for the two androgen-insensitive prostate DU145 and PC3 cancer cell lines.

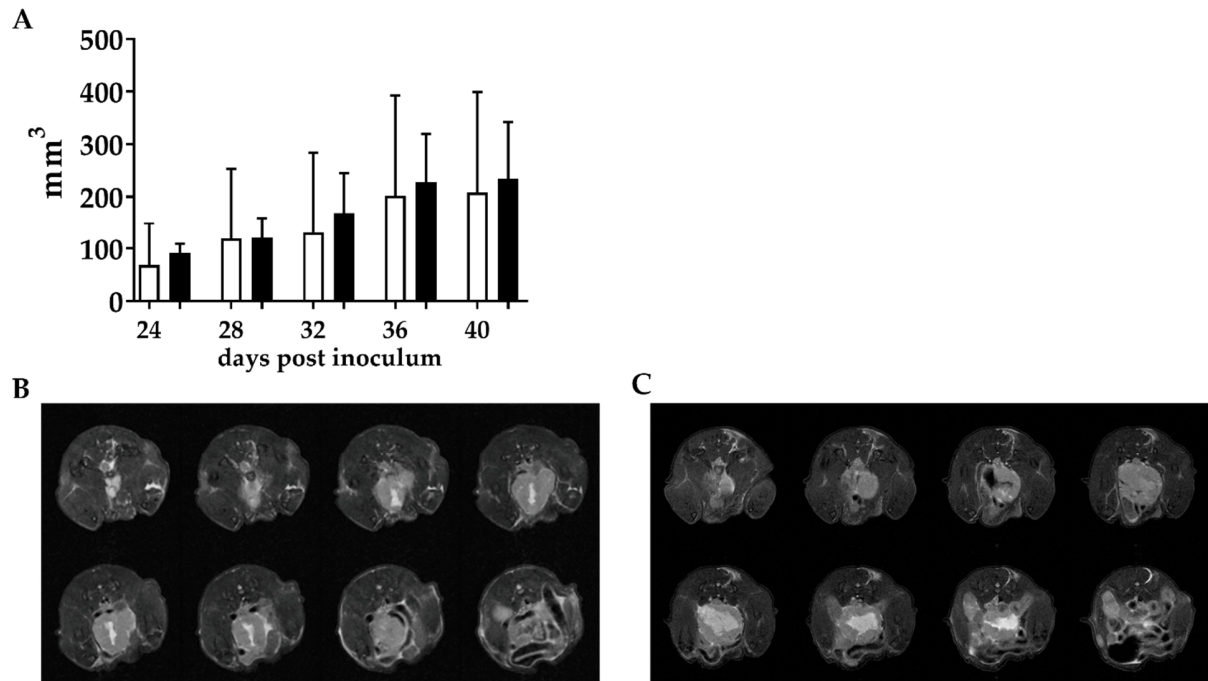

**Figure S3.** Tumor volume upon chronic Esomeprazole treatment for the DU145 prostate orthotopic murine model. Tumor volumes were measured from MRI T<sub>2</sub>-weighted anatomical images for untreated (n = 4) and treated (n = 4) groups (A). Representative T<sub>2</sub>-weighted anatomical images of orthotopic DU145 prostate tumors (8 slices) of untreated (B) and treated mice (C) at one-week post-Esomeprazole treatment.
